# Supplementary material for: Enhanced visible-light-driven photocatalysis from WS2 quantum dots coupled to BiOCl nanosheets: synergistic effect and mechanism insight
Source: Royal Society of Chemistry journal article supplement (doi:10.1039/c7cy01784g), 2017-11-02
Supplement: c7cy01784g1.pdf [file c7cy01784g1.pdf]

## Supplementary Material

# Enhanced Visible-Light-Driven Photocatalysis from WS<sub>2</sub> Quantum Dots Coupled to BiOCl nanosheets: Synergistic effect and mechanism insight

Peiyuan Xiao<sup>a</sup>, Jufeng Lou<sup>a</sup>, Huixian Zhang<sup>a</sup>, Weili Song<sup>a</sup>, Xi-Lin Wu<sup>a,\*</sup>, Hongjun Lin<sup>a</sup>, Jianrong Chen<sup>a,\*</sup>, Shoujie Liu<sup>c</sup>, Xiangke Wang<sup>a,b</sup>

<sup>a</sup>College of Geography and Environmental Science, Zhejiang Normal University, Jinhua, 321004, China

<sup>b</sup>School of Environment and Chemical Engineering, North China Electric Power University, Beijing 102206, China

<sup>c</sup>College of Chemistry and Materials Science, Anhui Normal University, Wuhu, 241000, China

\*Corresponding author

E-mail: [dbwxi@zjnu.cn](mailto:dbwxi@zjnu.cn) (X-L. Wu); [cjr@zjnu.cn](mailto:cjr@zjnu.cn) (J-R. Chen).

Tel.: +86 579 82291275;

Fax: +86 579 82282273.

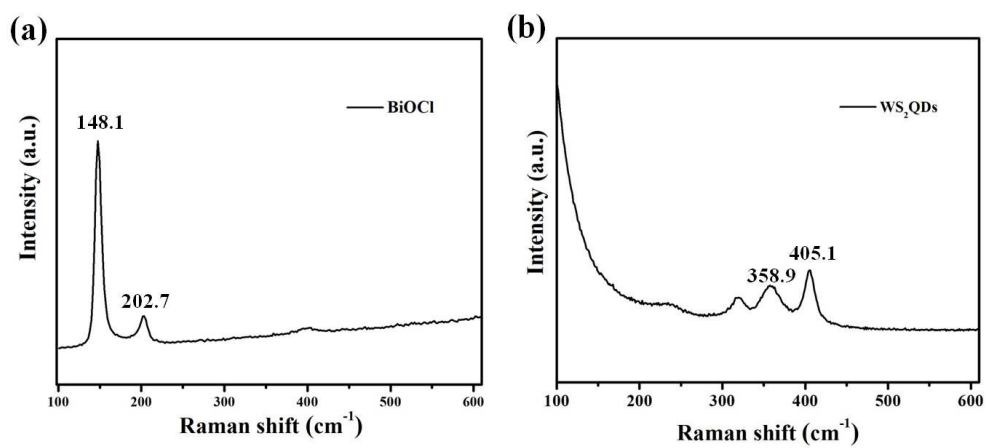

Fig. S1. Raman spectra of the BiOCl and  $\text{WS}_2/\text{BiOCl}$ -2 .

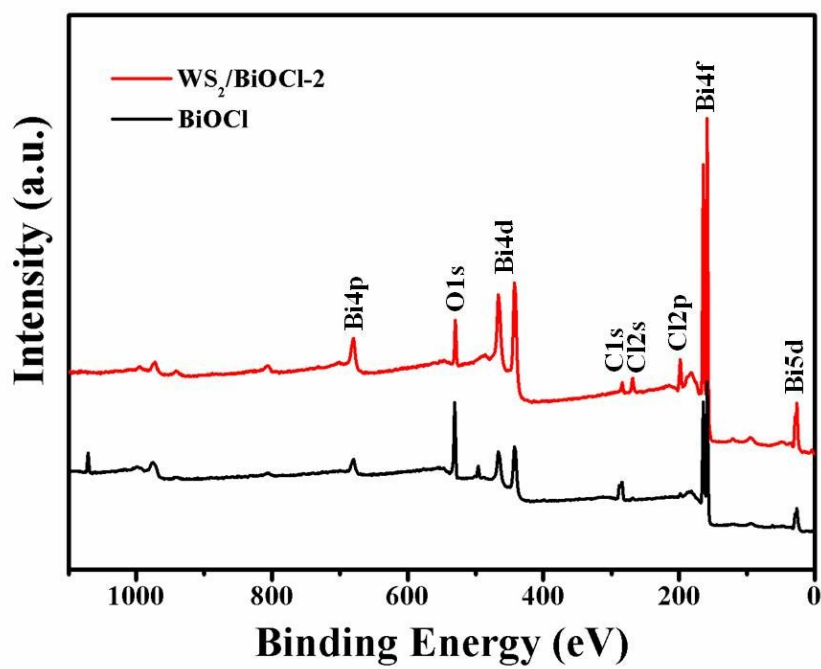

Fig. S2. XPS survey of the BiOCl and  $\text{WS}_2/\text{BiOCl}$ -2 .

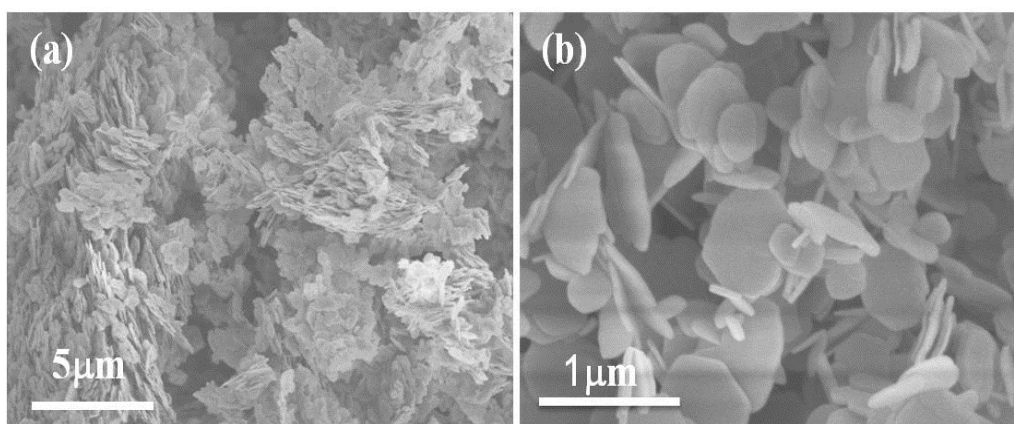

**Fig. S3.** (a) low magnification and (b) high magnification SEM images of the BiOCl.

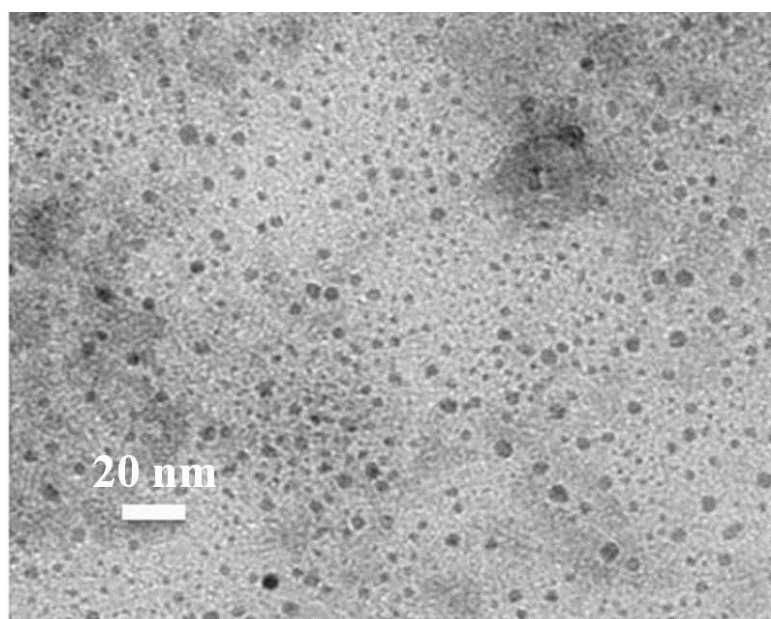

**Fig. S4.** TEM image of the WS<sub>2</sub> QDs.

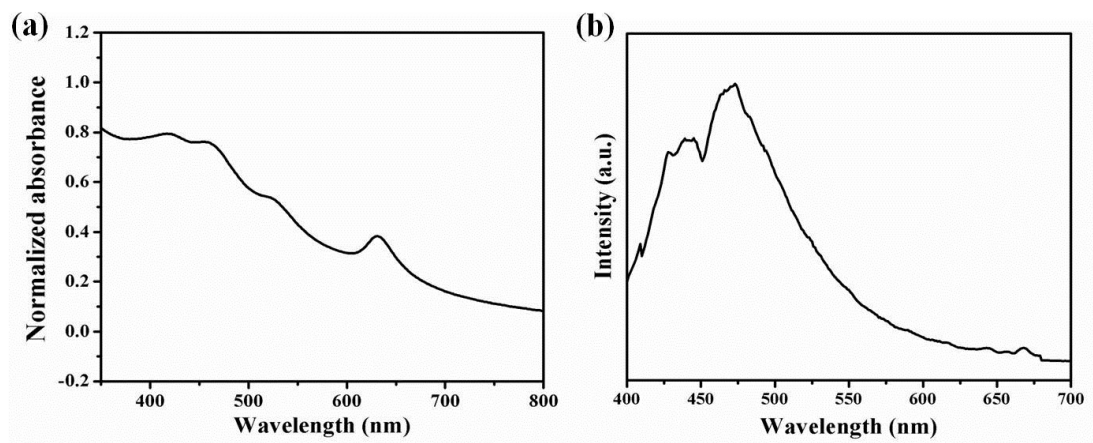

**Fig. S5.** (a) UV–Vis absorption spectrum and (b) PL emission spectrum (Ex = 380 nm) of the WS<sub>2</sub> quantum dots.

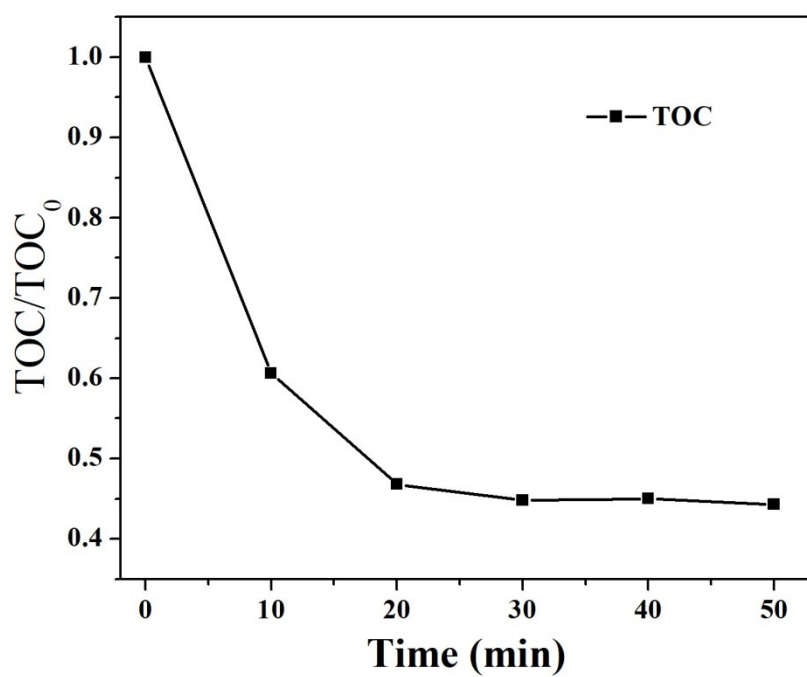

**Fig. S6.** Time dependent TOC removal percentage of photocatalytic degradation of RhB by the WS<sub>2</sub>/BiOCl-2 (initial RhB concentration = 30 mg/L, dosage of catalysts = 0.2 g/L);

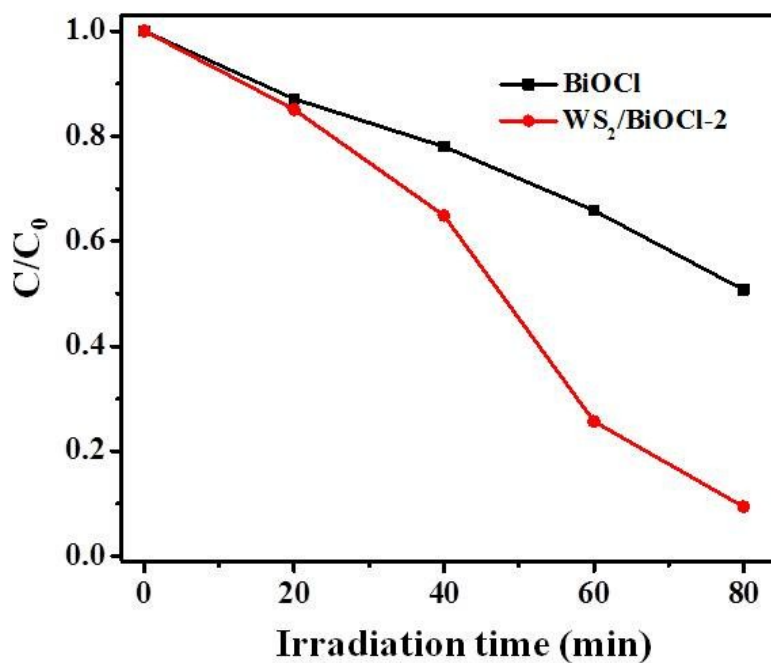

**Fig. S7.** (a) Photocatalytic degradation of Congo red (CR) by the BiOCl and WS<sub>2</sub>/BiOCl-2 (initial CR concentration = 40 mg/L, dosage of catalysts = 0.2 g/L).

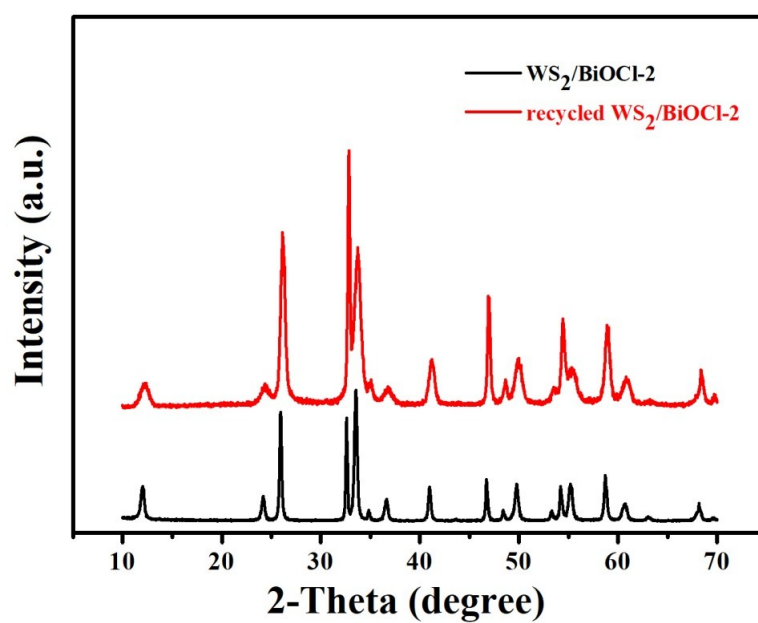

**Fig.S8.** XRD patterns of the WS<sub>2</sub>/BiOCl-2 before and after cyclic degradation experiments.

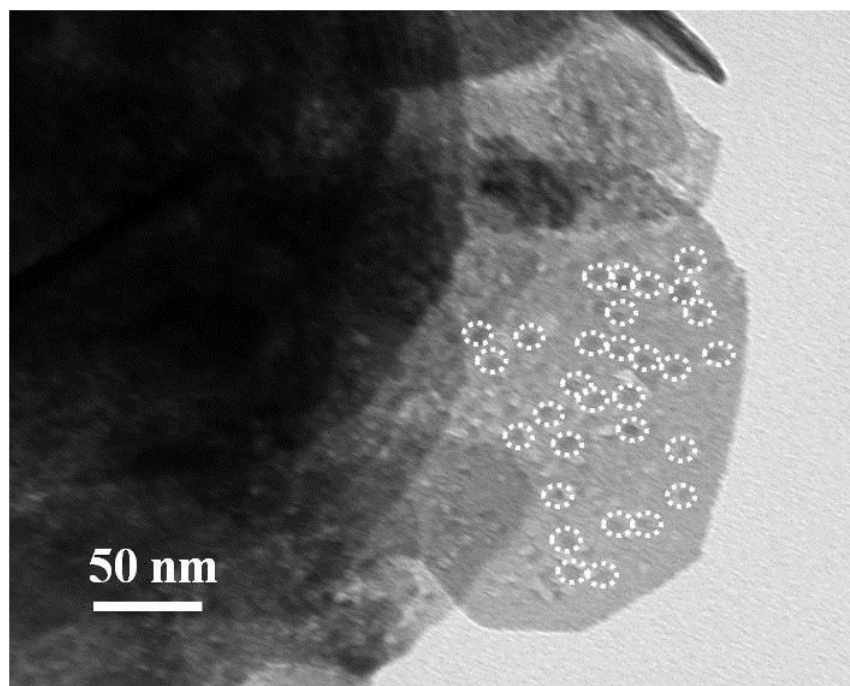

**Fig.S9.** TEM image of the WS<sub>2</sub>/BiOCl-2 after cyclic degradation experiments.

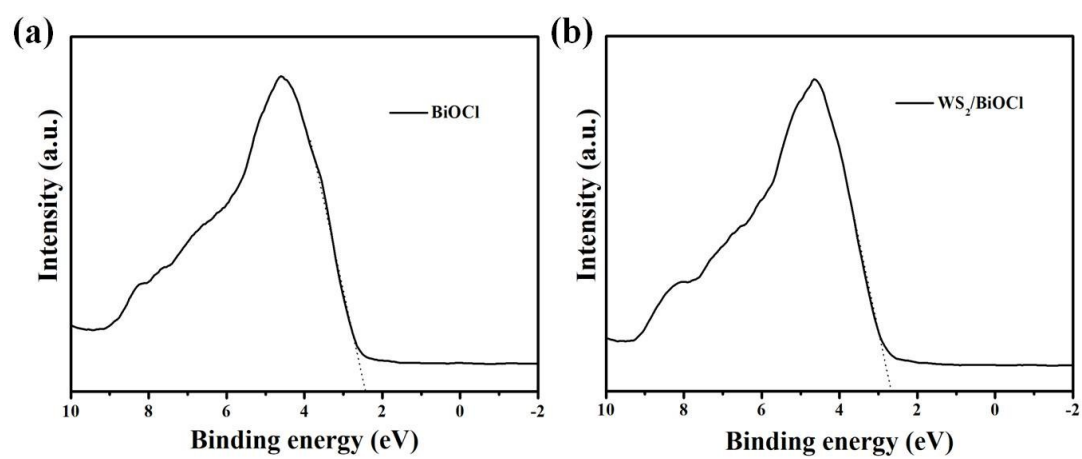

**Fig. S10.** Valence band XPS spectra of the (a) BiOCl and (b) WS<sub>2</sub>/BiOCl.

**Table S1** W content in the samples (calculated from the ICP data).

|                         | WS <sub>2</sub> /BiOCl-1 | WS <sub>2</sub> /BiOCl-2 | WS <sub>2</sub> /BiOCl-3 |
|-------------------------|--------------------------|--------------------------|--------------------------|
| W concentration (mg/L)  | 1.35                     | 2.84                     | 4.20                     |
| W % (mg/g)              | 13.5                     | 28.4                     | 42.0                     |
| WS <sub>2</sub> % (wt%) | 1.82                     | 3. 83                    | 5.66                     |

The samples for ICP analysis were prepared by dissolve 10 mg of the WS<sub>2</sub>/BiOCl in aqua regia and diluted to 100 mL.
